Anesthesiology  
65:702, 1986

*In reply:*—We thank Dr. Drummond for his interesting comments. However, we would like to add the following remarks.

Previous work has shown, in *in vitro* experiments, that high concentrations of halothane are responsible for a decrease in diaphragmatic function after both direct and indirect stimulation.<sup>1</sup> Therefore, the purpose of our study was to determine, *in vivo*, if it was possible to observe a decrease in diaphragmatic function in dogs anesthetized with halothane.<sup>2</sup> As we mentioned in our study, transdiaphragmatic pressure (P<sub>di</sub>) is influenced by the length and the shape of the diaphragm. During airway occlusion there is a slight shortening of the diaphragm.

However, the purpose of our study was not to demonstrate that during airway occlusion P<sub>di</sub> remains a truly isometric pressure, but to observe the changes in this widely used index during increasing concentrations of halothane (F<sub>I</sub>hal). We found that increasing levels of halothane are associated with a proportional decrease in P<sub>di</sub>. Halothane inhalation is associated with reduced stability of the chest wall that can result in an indrawing of the thorax during occluded inspiration, and therefore in a decrease in P<sub>di</sub>. However, there is no evidence that the instability of the chest wall increases with increasing levels of halothane anesthesia. Instability of the chest wall is already present with 0.5% halothane, and no further significant changes are observed with higher concentrations of halothane. With isoflurane, Mankikian *et al.*<sup>3</sup> observed the same phenomenon: the instability of the chest wall appears at 0.5 MAC, but no further change is observed with higher concentrations. Therefore, we believe that the progressive decrease in P<sub>di</sub> associated with increasing F<sub>I</sub>hal results from an effect of halothane on diaphragmatic function.

The other comment made by Dr. Drummond concerns the possibility that the decrease in P<sub>di</sub> may result from hypercapnia associated with halothane anesthesia, rather than from the effect of halothane. In three dogs of our experiment that stopped breathing at 1.5 and 2% halothane, we repeated P<sub>di</sub> measurements during phrenic nerve stimulation, while the animals were mechanically ventilated and had normal values of P<sub>A</sub>CO<sub>2</sub>. In these three

animals, P<sub>di</sub> was still lower than the values obtained at the lower F<sub>I</sub>hal.

Moreover, since this experiment, it has been shown in as yet unpublished *in vivo* experiments (effect of halothane on diaphragm and hindlimb muscle in rats. B. Dureuil *et al.*) that clinical levels of halothane decrease diaphragmatic contractility in a dose-related fashion in mechanically ventilated rats in which P<sub>A</sub>CO<sub>2</sub> has been maintained constant.

Further studies are now needed to determine the precise mechanisms of the halothane-induced diaphragmatic dysfunction and its importance in the ventilatory depression observed during halothane anesthesia.

F. CLERGUE, M.D.  
*Professor of Anesthesia*  
*Département d'Anesthésie-Réanimation*

G. H. PITIE-SALPETRIERE  
*83-47 boul. de l'hôpital*  
*75651 Paris Cédex 13 France*

M. AUBIER, M.D.  
*Professor of Pneumology*  
*Service de Pneumologie*  
*Hôpital Beaujon*  
*100, boul du Général Leclerc*  
*92110 Clichy, France*

#### REFERENCES

1. Pollard BJ, Millar PA: Potentiating and depressant effects of inhalation anesthetics on the rat phrenic-diaphragm preparation. *Br J Anaesth* 45:404-415, 1973
2. Clergue F, Viïres N, Lemesle P, Aubier M, Viars P, Pariente R: Effect of halothane on diaphragmatic muscle function in pentobarbital-anesthetized dogs. *ANESTHESIOLOGY* 64:181-187, 1986
3. Cantineau JP, Mankikian B, Poete P, Sartene R, Clergue F, Viars P: Ventilatory pattern and chest wall mechanics during isoflurane anesthesia (abstract). *ANESTHESIOLOGY* 63:A551, 1985
4. Juan G, Calverley P, Talamo C, Schnader J, Roussos C: Effect of carbon dioxide on diaphragmatic function in human beings. *N Engl J Med* 310: 874-879, 1984

(Accepted for publication August 18, 1986.)
